# Supplementary material for: A novel IL-17 signaling pathway controlling keratinocyte proliferation and tumorigenesis via the TRAF4–ERK5 axis
Source: PubMed Central journal article supplement — J Exp Med. 2015 Sep 21;212(10):1571–87. doi: 10.1084/jem.20150204 (PMC4577838; doi:10.1084/jem.20150204), 2015-09-21
Supplement: supp_jem.20150204_JEM_20150204_sm.pdf [file supp_jem.20150204_JEM_20150204_sm.pdf]

## SUPPLEMENTAL MATERIAL

Wu et al., <http://www.jem.org/cgi/content/full/jem.20150204/DC1>**Table S1.** Primer sequences used for real-time qPCR

| Name                              | Forward primer                | Reverse primer                |
|-----------------------------------|-------------------------------|-------------------------------|
| <b>Primers specific for mouse</b> |                               |                               |
| c-myc                             | 5'-GTCCTCAGACACGGAGGAAA-3'    | 5'-TCCAATTCAGGGATCTGGTC-3'    |
| Erk5                              | 5'-TAGTGGGTTGCCTGGTTCTG-3'    | 5'-GTCTGCCTGGCTATCCTGTG-3'    |
| Tnfa                              | 5'-CCCTCAGACTCAGATCATCTTCT-3' | 5'-GCTACGACGTGGGCTACAG-3'     |
| Ifng                              | 5'-TCAACAACCCACAGGTC-3'       | 5'-GACTCCTTTTCCGCTTCCTG-3'    |
| $\Delta$ NTrp63                   | 5'-GAAAACAATGCCCAGACTCAA-3'   | 5'-TGTGCGTGGTCTGTGTTG-3'      |
| Trp63                             | 5'-AGACCTCAGTGACCCCATGT-3'    | 5'-TGTGCGTGGTCTGTGTTG-3'      |
| Il6                               | 5'-ACCACAGTGAGGAATGTCCA-3'    | 5'-GGACCAAGACCATCCAATT-3'     |
| Il11                              | 5'-GTTCTCCTAATCCCGATCCCT-3'   | 5'-CAGGAAGCTGCAAAGATCCCA-3'   |
| Il22                              | 5'-AGCAGGTGCTCAACTTCACC-3'    | 5'-TGGATGTTCTGGTCGTCACC-3'    |
| Il17a                             | 5'-TTTAACTCCCTTGGCGCAAAA-3'   | 5'-CTTCCCTCCGCATTGACAC-3'     |
| Steap4                            | 5'-GGCTCTCCAGTCAGGAACACT-3'   | 5'-GGTGAGCCCAAGAGTACGAG-3'    |
| Traf4                             | 5'-CCCGGCTTCGACTACAAGTTC-3'   | 5'-TCAGGGCATTGGAAGACTCCT-3'   |
| Cxcl1                             | 5'-TAGGGTGAGGACATGTGTGG-3'    | 5'-AAATGTCCAAGGGAAGCGT-3'     |
| Actin                             | 5'-GGTCATCACTATTGGCAACG-3'    | 5'-ACGGATGTCAACGTCACACT-3'    |
| <b>Primers specific for human</b> |                               |                               |
| Steap4                            | 5'-CCTCAGCCCTTCAAATCTCAG-3'   | 5'-ACATGGCATGATTAGGACAAACT-3' |
| Traf4                             | 5'-CAGGAGAGTGTCTACTGTGAGA-3'  | 5'-CCACACCACATTGGTTGGG-3'     |
| $\Delta$ Np63                     | 5'-CCAGACTCAATTTAGTGAGC-3'    | 5'-TGCGCGTGGTCTGTGTTA-3'      |
| p63                               | 5'-GGACCTGAGTGACCCCATGT-3'    | 5'-TGCGCGTGGTCTGTGTTA-3'      |
| Krt16                             | 5'-GACCCGGCGAGATGTGAAC-3'     | 5'-CTGCTCGTACTGGTCACGC-3'     |
| Actin                             | 5'-CTCTCCAGCCCTCCTTCATC-3'    | 5'-CGTTGTTGGCATAACAGGTCC-3'   |

**Table S2.** Specimen information of human SCC

| Specimen | Gender | Age       | Location                                     |
|----------|--------|-----------|----------------------------------------------|
|          |        | <i>yr</i> |                                              |
| N1       | M      | 54        | Abdomen                                      |
| N2       | F      | 59        | Breast                                       |
| N3       | M      | 57        | Cheek                                        |
| N4       | M      | 42        | Groin                                        |
| N5       | F      | 68        | Chest                                        |
| N6       | F      | 46        | Breast                                       |
| N7       | M      | 80        | Abdomen                                      |
| N8       | M      | 51        | Back                                         |
| N9       | F      | 67        | Abdomen                                      |
| N10      | M      | 88        | Face                                         |
| N11      | F      | 49        | Knee                                         |
| N12      | F      | 58        | Abdomen                                      |
| N13      | M      | 42        | Chest                                        |
| N14      | F      | 42        | Face                                         |
| N15      | F      | 46        | Abdomen                                      |
| SCC1     | M      | 70        | Cheek                                        |
| SCC2     | F      | 43        | Left arm                                     |
| SCC3     | M      | 88        | Left preauricular (ear)                      |
| SCC4     | F      | 80        | Right cheek                                  |
| SCC5     | M      | 80        | Right tempus                                 |
| SCC6     | F      | 54        | Left leg                                     |
| SCC7     | M      | 68        | Nose bridge                                  |
| SCC8     | M      | 64        | Metastatic groin secca from the buttock skin |
| SCC9     | M      | 83        | Ear                                          |
| SCC10    | M      | 77        | Ear                                          |
| SCC11    | M      | 82        | Left ear lobe                                |
| SCC12    | M      | 79        | Left cheek                                   |
| SCC13    | F      | 75        | Right index ginger                           |
| SCC14    | M      | 77        | Right dorsal hand                            |
| SCC15    | M      | 77        | Right forearm                                |
| SCC16    | M      | 64        | Right preauricular (ear)                     |
| SCC17    | M      | 74        | Nose                                         |
